# Supplementary material
Source: publisher figshare collection journal article supplement (https://tandf.figshare.com/articles/dataset/_/7725092)
Supplement: Supplementary file 1 [file 1]

Table 2. Maximal Response ERG amplitudes and implicit times of ST3GAL5<sup>+/+</sup> and ST3GAL5<sup>-/-</sup> mice

| Stimulus strength<br>(cd-s/m <sup>2</sup> ) | Genotype           | ST3GAL5 <sup>+/+</sup>   |                           |                          | ST3GAL5 <sup>-/-</sup>   |                          |                          | Effect of |       |                |
|---------------------------------------------|--------------------|--------------------------|---------------------------|--------------------------|--------------------------|--------------------------|--------------------------|-----------|-------|----------------|
|                                             | Age (months)       | 4                        | 9                         | 12                       | 4                        | 9                        | 12                       | Genotype  | Age   | Genotype X Age |
|                                             | Eyes (n)           | 5                        | 9                         | 5                        | 4                        | 7                        | 8                        |           |       |                |
| <b>a-wave</b>                               |                    |                          |                           |                          |                          |                          |                          |           |       |                |
| 2.5                                         | Amplitude (μV)     | 174±25.5 <sup>ab</sup>   | 187 ± 48.1 <sup>ab</sup>  | 149 ± 76.0 <sup>ab</sup> | 154±13.2 <sup>ab</sup>   | 214 ± 77.5 <sup>b</sup>  | 108 ± 59.7 <sup>a</sup>  | NS        | 0.009 | NS             |
|                                             | Implicit time (ms) | 18 ± 2.8                 | 17 ± 2.7                  | 19 ± 4.0                 | 19 ± 2.3                 | 18 ± 3.5                 | 18 ± 4.7                 | NS        | NS    | NS             |
| 0.6                                         | Amplitude (μV)     | 127 ± 9.4                | 136 ± 45.1                | 116± 77.3                | 141 ± 23.9               | 156 ± 45.7               | 83 ± 44.5                | NS        | 0.04  | NS             |
|                                             | Implicit time (ms) | 23 ± 2.0                 | 22 ± 1.7                  | 23± 2.6                  | 24 ± 1.8                 | 23 ± 2.2                 | 26 ± 5.1                 | NS        | NS    | NS             |
| 0.25                                        | Amplitude (μV)     | 65 ± 7.4                 | 83 ± 22.4                 | 84± 87.2                 | 55 ± 42.8                | 96 ± 37.8                | 49 ± 28.5                | NS        | NS    | NS             |
|                                             | Implicit time (ms) | 25 ± 1.9                 | 25 ± 2.3                  | 25± 2.3                  | 27 ± 2.3                 | 25 ± 2.7                 | 25 ± 4.5                 | NS        | NS    | NS             |
| <b>b-wave</b>                               |                    |                          |                           |                          |                          |                          |                          |           |       |                |
| 2.5                                         | Amplitude (μV)     | 486 ± 90.3               | 507.4 ± 171.4             | 437 ± 249.4              | 467 ± 59.1               | 605 ± 239.1              | 321 ± 178.0              | NS        | NS    | NS             |
|                                             | Implicit time (ms) | 40 ± 5.9                 | 39 ± 4.1                  | 39 ± 2.4                 | 42 ± 5.5                 | 45 ± 10.9                | 50 ± 13.3                | 0.02      | NS    | NS             |
| 0.6                                         | Amplitude (μV)     | 441 ± 77.6               | 444 ± 172.9               | 402 ± 232.5              | 455 ± 84.8               | 527 ± 151.1              | 286 ± 149.8              | NS        | NS    | NS             |
|                                             | Implicit time (ms) | 43 ± 4.8                 | 40 ± 3.7                  | 42 ± 3.1                 | 49 ± 6.2                 | 46± 8.2                  | 52 ± 12.2                | NS        | NS    | NS             |
| 0.25                                        | Amplitude (μV)     | 384 ± 82.7 <sup>ab</sup> | 395 ± 120.0 <sup>ab</sup> | 353± 193.5 <sup>ab</sup> | 387 ± 73.7 <sup>ab</sup> | 511 ± 160.0 <sup>a</sup> | 264 ± 130.5 <sup>b</sup> | NS        | 0.03  | NS             |
|                                             | Implicit time (ms) | 45 ± 4.4                 | 43 ± 6.7                  | 48 ± 8.3                 | 56 ± 5.3                 | 48± 9.6                  | 50 ± 11.0                | NS        | NS    | NS             |

NS: P value>0.05

The a-wave amplitude is described in absolute volume.
