# Supplementary material
Source: publisher figshare collection journal article supplement (https://tandf.figshare.com/articles/dataset/_/7725092)
Supplement: Supplementary file 2 [file 1]

Table 1. Rod ERG amplitudes and implicit times of ST3GAL5<sup>+/+</sup> and ST3GAL5<sup>-/-</sup> mice

| Stimulus strength (cd-s/m <sup>2</sup> ) | Genotype           | ST3GAL5 <sup>+/+</sup> |                         |                         | ST3GAL5 <sup>-/-</sup>  |                        |                       | Effect of |       |                |
|------------------------------------------|--------------------|------------------------|-------------------------|-------------------------|-------------------------|------------------------|-----------------------|-----------|-------|----------------|
|                                          | Age (months)       | 4                      | 9                       | 12                      | 4                       | 9                      | 12                    | Genotype  | Age   | Genotype X Age |
|                                          | Eyes (n)           | 5                      | 9                       | 5                       | 4                       | 7                      | 8                     |           |       |                |
| <b>a-wave</b>                            |                    |                        |                         |                         |                         |                        |                       |           |       |                |
| 0.008                                    | Amplitude (μV)     | 14 ± 9.4               | 13 ± 8.9                | 14 ± 21.1               | 13 ± 12.5               | 17 ± 9.2               | 8 ± 5.2               | NS        | NS    | NS             |
|                                          | Implicit time (ms) | 24 ± 6.1               | 22 ± 9.2                | 25 ± 14.5               | 23 ± 15.8               | 27 ± 5.5               | 23.3 ± 11.8           | NS        | NS    | NS             |
| 0.0008                                   | Amplitude (μV)     | 9 ± 6.9                | 9 ± 5.9                 | 9 ± 8.6                 | 6 ± 10.5                | 10 ± 8.2               | 8 ± 8.3               | NS        | NS    | NS             |
|                                          | Implicit time (ms) | 22 ± 14.5              | 25 ± 4.9                | 26 ± 15.9               | 16 ± 18.9               | 25 ± 12.0              | 20.4 ± 13.5           | NS        | NS    | NS             |
| 0.0008                                   | Amplitude (μV)     | 10 ± 19.5              | N.D.                    | N.D.                    | N.D.                    | N.D.                   | N.D.                  | NS        | NS    | NS             |
|                                          | Implicit time (ms) | 8.6 ± 17.3             | N.D.                    | N.D.                    | N.D.                    | N.D.                   | N.D.                  | NS        | NS    | NS             |
| <b>b-wave</b>                            |                    |                        |                         |                         |                         |                        |                       |           |       |                |
| 0.008                                    | Amplitude (μV)     | 284 ± 108.1            | 292 ± 145.9             | 261 ± 185.1             | 284 ± 111.6             | 391 ± 127.2            | 189 ± 107.2           | NS        | NS    | NS             |
|                                          | Implicit time (ms) | 55 ± 6.8 <sup>c</sup>  | 60 ± 10.7 <sup>bc</sup> | 76 ± 10.7 <sup>ab</sup> | 75 ± 15.3 <sup>ab</sup> | 75 ± 8.2 <sup>ab</sup> | 78 ± 9.0 <sup>a</sup> | 0.001     | 0.002 | NS             |
| 0.0008                                   | Amplitude (μV)     | 229 ± 104.0            | 254 ± 140.9             | 186 ± 152.5             | 263 ± 97.1              | 325 ± 86.2             | 156 ± 93.6            | NS        | 0.04  | NS             |
|                                          | Implicit time (ms) | 64 ± 14.0 <sup>b</sup> | 66 ± 13.5 <sup>b</sup>  | 98 ± 16.0 <sup>a</sup>  | 81 ± 16.2 <sup>ab</sup> | 85 ± 4.9 <sup>a</sup>  | 88 ± 6.8 <sup>a</sup> | 0.03      | 0.001 | NS             |
| 0.0008                                   | Amplitude (μV)     | 85 ± 39.2              | 68 ± 32.4               | 66 ± 45.0               | 59 ± 27.8               | 97 ± 36.6              | 66 ± 29.6             | NS        | NS    | NS             |
|                                          | Implicit time (ms) | 84 ± 8.2               | 83 ± 11.4               | 90 ± 22.5               | 95 ± 14.0               | 96 ± 8.0               | 101 ± 7.4             | NS        | NS    | NS             |

NS: P value > 0.05 The a-wave amplitude is described in absolute volume.

If the a-wave was undetectable then b-wave amplitude was measured from the baseline at stimulus onset.
